# Supplementary material
Source: publisher figshare collection journal article supplement (https://acs.figshare.com/ndownloader/files/4098613)

Protein iBAQ distribution on chromosome 20

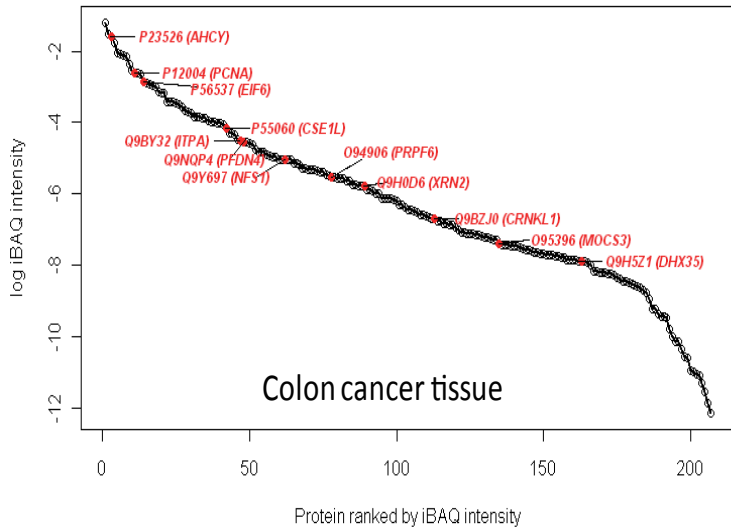

Protein iBAQ distribution on chromosome 20

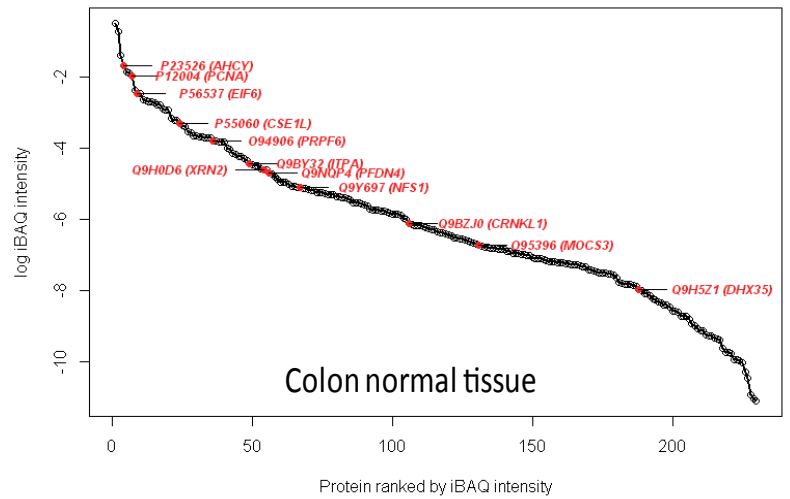

Protein iBAQ distribution on chromosome 20

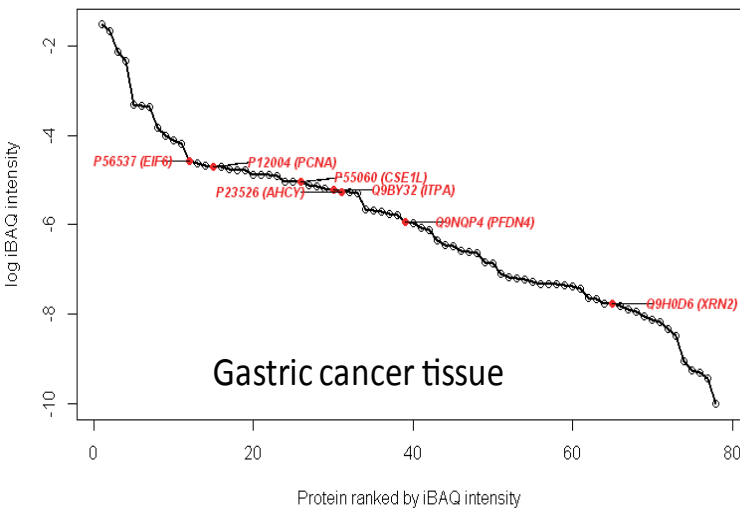

Protein iBAQ distribution on chromosome 20

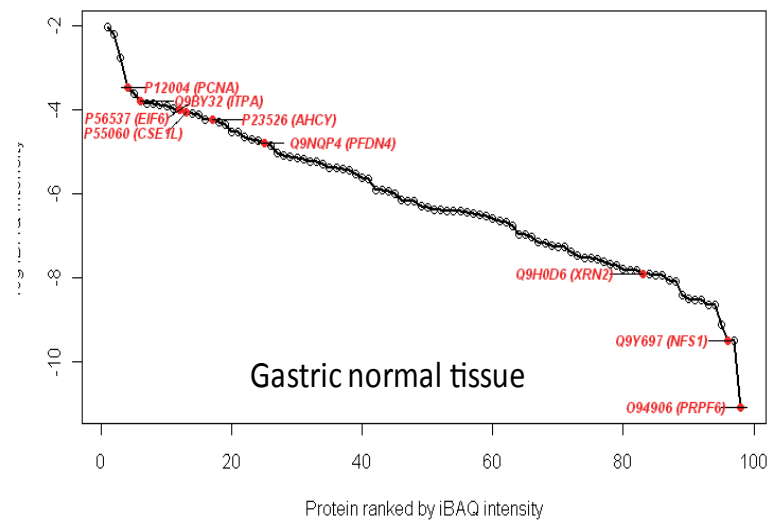

Protein Sln distribution on chromosome 20

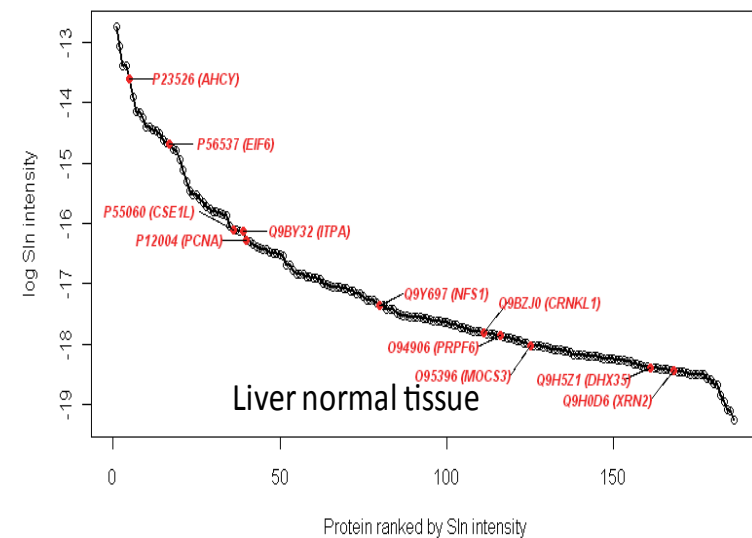

Supplement: Supplementary file 1 [file 4098613]
